# Supplementary material
Source: publisher figshare collection journal article supplement (https://sage.figshare.com/ndownloader/files/27530794)
Supplement: Supplementary file 1 [file 27530794]

## SUPPLEMENTARY DOCUMENT TO

### “A Review of Conflict and Cohesion in Social Relationships in Family Firms”

This supplementary document contains additional information not included in the manuscript due to space constraints. The appendix is composed of three Tables. Table S1 provides a detailed description of the queries adopted in our search. Table S2 delineates the analytical protocol used. Finally, Table S3 provides a detailed overview of the 89 papers included in our review, reporting for each the method employed, sample description, theory/perspective adopted, geographic area, whether it is a FF versus non-FF study or a study on FFs only, and the study focus.

**Table S1.** Details on the queries used to search the literature (extraction limiters criteria reported in the notes below the table)

| Procedures                                   |                                                                                                                                                                                                                                                                                                                                                            | WOS     | EBSCO  |
|----------------------------------------------|------------------------------------------------------------------------------------------------------------------------------------------------------------------------------------------------------------------------------------------------------------------------------------------------------------------------------------------------------------|---------|--------|
| 1a. Search on ISI Web of Science®            | (TS=("family business*" OR "family firm*" OR "family enter*" OR "familin*" OR "family control*" OR "family led*" OR "family owner*" OR "family-based") AND TS=("Social Capital*" OR "tie*" OR "cohesi*" OR "harmon*" OR "attachment*" OR "love" OR "affection" OR "conflict*" OR "disagree*" OR "disharmon*" OR "dislik*" OR "strif*" OR "tension"))       | 1257    |        |
|                                              | TOTAL in Web of Science                                                                                                                                                                                                                                                                                                                                    | N= 1257 |        |
| 1b. Search on EBSCO Business Source Premiere | KW ( ("family business*" OR "family firm*" OR "family enter*" OR "familin*" OR "family control*" OR "family led*" OR "family owner*" OR "family-based") ) AND KW ( ("Social Capital*" OR "tie*" OR "cohesi*" OR "harmon*" OR "attachment*" OR "love" OR "affection" OR "conflict*" OR "disagree*" OR "disharmon*" OR "dislik*" OR "strif*" OR "tension") ) |         | 86     |
|                                              | AB ( ("family business*" OR "family firm*" OR "family enter*" OR "familin*" OR "family control*" OR "family led*" OR "family owner*" OR "family-based") ) AND AB ( ("Social Capital*" OR "tie*" OR "cohesi*" OR "harmon*" OR "attachment*" OR "love" OR "affection" OR "conflict*" OR "disagree*" OR "disharmon*" OR "dislik*" OR "strif*" OR "tension") ) |         | 479    |
|                                              | TI ( ("family business*" OR "family firm*" OR "family enter*" OR "familin*" OR "family control*" OR "family led*" OR "family owner*" OR "family-based") ) AND TI ( ("Social Capital*" OR "tie*" OR "cohesi*" OR "harmon*" OR "attachment*" OR "love" OR "affection" OR "conflict*" OR "disagree*" OR "disharmon*" OR "dislik*" OR "strif*" OR "tension") ) |         | 75     |
|                                              | TOTAL in EBSCO Business Source Premiere without duplicates                                                                                                                                                                                                                                                                                                 |         | N= 514 |
| 1c. Search on EBSCO EconLit                  | KW ( ("family business*" OR "family firm*" OR "family enter*" OR "familin*" OR "family control*" OR "family led*" OR "family owner*" OR "family-based") ) AND KW ( ("Social Capital*" OR "tie*" OR "cohesi*" OR "harmon*" OR "attachment*" OR "love" OR "affection" OR "conflict*" OR "disagree*" OR "disharmon*" OR "dislik*" OR "strif*" OR "tension") ) |         | 0      |
|                                              | AB ( ("family business*" OR "family firm*" OR "family enter*" OR "familin*" OR "family control*" OR "family led*" OR "family owner*" OR "family-based") ) AND AB ( ("Social Capital*" OR "tie*" OR "cohesi*" OR "harmon*" OR "attachment*" OR "love" OR "affection" OR "conflict*" OR "disagree*" OR "disharmon*" OR "dislik*" OR "strif*" OR "tension") ) |         | 145    |
|                                              | TI ( ("family business*" OR "family firm*" OR "family enter*" OR "familin*" OR "family control*" OR "family led*" OR "family owner*" OR "family-based") ) AND TI ( ("Social Capital*" OR "tie*" OR "cohesi*" OR "harmon*" OR "attachment*" OR "love" OR "affection" OR "conflict*" OR "disagree*" OR "disharmon*" OR "dislik*" OR "strif*" OR "tension") ) |         | 17     |
|                                              | TOTAL in EBSCO EconLit without duplicates                                                                                                                                                                                                                                                                                                                  |         | N= 147 |
|                                              | TOTAL STEP 1                                                                                                                                                                                                                                                                                                                                               | N= 1257 | N= 661 |

|                                                                                                                                                                                                                                         |                                                                                                                                                                                   |                                    |        |
|-----------------------------------------------------------------------------------------------------------------------------------------------------------------------------------------------------------------------------------------|-----------------------------------------------------------------------------------------------------------------------------------------------------------------------------------|------------------------------------|--------|
| 2. Exclusion of non-ABS Journals                                                                                                                                                                                                        | Confine the search to articles published in academic journals listed in the Chartered Association of Business Schools' Academic Journal Guide (2018) - ABS Academic Journal Guide | -632                               | -150   |
|                                                                                                                                                                                                                                         | TOTAL STEP 2                                                                                                                                                                      | N= 625                             | N= 511 |
|                                                                                                                                                                                                                                         |                                                                                                                                                                                   | WOS and EBSCO                      |        |
| 3. Databases Union                                                                                                                                                                                                                      | Database merging                                                                                                                                                                  | N= 1136                            |        |
|                                                                                                                                                                                                                                         | Exclusion of duplicates                                                                                                                                                           | -415                               |        |
|                                                                                                                                                                                                                                         | TOTAL STEP 3                                                                                                                                                                      | N= 721                             |        |
| 4. Sample identification                                                                                                                                                                                                                | Divide remaining articles into three categories (A – papers relevant to the research objective, B – papers whose relevance was unclear, C – non-relevant papers).                 | A: N= 70<br>B: N= 107<br>C: N= 544 |        |
| 5.                                                                                                                                                                                                                                      | Read and discuss the B papers for inclusion of only relevant articles in line with the literature review scope                                                                    |                                    |        |
|                                                                                                                                                                                                                                         | TOTAL STEP 5                                                                                                                                                                      | N= 86                              |        |
| 6.                                                                                                                                                                                                                                      | Look at the studies in the sample papers' reference list (backward citation) and check their relevance through independent readings of manuscripts by each of the co-authors*     | 3                                  |        |
|                                                                                                                                                                                                                                         | FINAL SAMPLE                                                                                                                                                                      | N= 89                              |        |
| Notes: TS= Searches title, abstract, author keywords, and Keywords Plus; KW= keyword; AB= abstract; TI= title                                                                                                                           |                                                                                                                                                                                   |                                    |        |
| Extraction limiter criteria:                                                                                                                                                                                                            |                                                                                                                                                                                   |                                    |        |
| <ul style="list-style-type: none"><li>• Published up to 31 December 2019, with no initial time limit set</li><li>• Scholarly (peer reviewed) journals</li><li>• Language: English</li><li>• Document types: article or review</li></ul> |                                                                                                                                                                                   |                                    |        |
| *The three articles added in Step 6 are: Davis & Harveston (1999); Levinson (1971); Salvato & Melin (2008).                                                                                                                             |                                                                                                                                                                                   |                                    |        |

**Table S2.** Analytic protocol used to review each study

|                                                                                                                                                                                                                                                                                                                                                                                                                                                                                                                                                                                                                                                                                                                                                                                                                                                                                                                                                                                                                                                                                                                                                                                                                                                                                                                                                                                                                         |
|-------------------------------------------------------------------------------------------------------------------------------------------------------------------------------------------------------------------------------------------------------------------------------------------------------------------------------------------------------------------------------------------------------------------------------------------------------------------------------------------------------------------------------------------------------------------------------------------------------------------------------------------------------------------------------------------------------------------------------------------------------------------------------------------------------------------------------------------------------------------------------------------------------------------------------------------------------------------------------------------------------------------------------------------------------------------------------------------------------------------------------------------------------------------------------------------------------------------------------------------------------------------------------------------------------------------------------------------------------------------------------------------------------------------------|
| <p><b>A. Article database preparation</b></p> <p>1. Create an Excel file including all the articles in our sample and the following columns:</p> <p><i>a) For the systematic analysis</i></p> <ul style="list-style-type: none"><li>• Creation of one column for each of the following aspects:</li><li>• Article ID</li><li>• Authors</li><li>• Type of study (i.e., empirical, conceptual, literature review)</li><li>• Nature of study (i.e., qualitative, quantitative, mix)</li><li>• Sample description</li><li>• Key findings (i.e., drivers, outcomes, moderators, mediators)</li><li>• Comparative study (i.e., focus on FFs only or comparison between FFs and non-FFs)</li><li>• Main theory(ies)/perspectives</li><li>• Level of analysis (i.e., family, FF, TMT/Boards)</li><li>• Research questions</li><li>• Hypotheses/propositions</li><li>• Measures of cohesion and conflict</li><li>• After reading and describing all the definitions, the researcher passed the analysis to two colleagues who referred back to the original articles, checked and corrected inconsistencies.</li></ul> <p><i>b) For the thematic ontological analysis</i></p> <ul style="list-style-type: none"><li>• Conflict definition (T1)</li><li>• Type of conflict (T2)</li><li>• Cohesion definition (T1)</li><li>• Type of cohesion (T2)</li><li>• Overall focus (conflict, cohesion, both, peripheral) (T3).</li></ul> |
| <p><b>Details of the process that led to the creation of the ontological map</b></p>                                                                                                                                                                                                                                                                                                                                                                                                                                                                                                                                                                                                                                                                                                                                                                                                                                                                                                                                                                                                                                                                                                                                                                                                                                                                                                                                    |
| <p><b>B. Identification of conceptualizations of conflict and cohesion</b></p> <p>1. A researcher read each article considering the main definitions of conflict and/or cohesion.</p> <p>2. A researcher identified a descriptive statement outlining the primary definitions (when available) for each article.</p> <p>3. After reading and describing all the definitions, the researcher passed the analysis to two colleagues who ensured that the descriptive statements in point 2 were complete and correct.</p> <p>4. Two researchers met to compare the descriptive statements and identify initial thematic names discussing eventual discrepancies in perceptions/opinions. The researchers met at every 25 articles.</p> <p>5. A first list of thematic names (T1, T2, and T3) was created for each article.</p> <p>6. Three researchers carefully re-reviewed all the articles and the classifications provided individually, checking for consistency and clarity in the classification, and annotating eventual discrepancies and thematic labels.</p> <p>7. The discrepancies and annotations were checked and discussed when needed, leading to a refined list of thematic names.</p>                                                                                                                                                                                                                  |
| <p><b>C. Definition of the ontological themes</b></p> <p>Three levels of thematic descriptions of the conceptualizations.</p> <p>T1 is the definition of conflict and/or cohesion provided in the article.</p> <p>T2 is a second order theme that includes the cluster of articles with similar conceptualizations.</p> <p>T3 is the macro-theme “conflict” or “cohesion” simply summarizing whether the article is about conflict and/or cohesion.</p>                                                                                                                                                                                                                                                                                                                                                                                                                                                                                                                                                                                                                                                                                                                                                                                                                                                                                                                                                                 |
| <p><b>D. Ontological map creation and validation</b></p> <p>1. A map that represents the various conceptualizations of conflict and cohesion (Figure 2a and Figure 2b) including the second order (T2) themes.</p> <p>2. A further check by all the authors individually returning to the articles and ensuring that the ontological map themes are consistent and fit.</p>                                                                                                                                                                                                                                                                                                                                                                                                                                                                                                                                                                                                                                                                                                                                                                                                                                                                                                                                                                                                                                             |
| <p><b>E. Process quality control</b></p> <p>1. Each article received the same attention, was coded by one author but independently checked by a second researcher.</p> <p>2. The analysis entailed the definition of three orders of themes with the aim of depth and completeness.</p> <p>3. All themes were controlled comparing them against each other (for differentiation) and back to the original classifications and definitions (for coherence).</p> <p>4. The authors of this analysis actively participated, sharing their reflections, doubts, perspectives, and discussing iteratively until reaching consensus on the classification.</p>                                                                                                                                                                                                                                                                                                                                                                                                                                                                                                                                                                                                                                                                                                                                                                |

**Table S3.** Papers included in the literature review.

| Article                                                                                                                                                                                                        | Method                     | Sample Description                                                                                                                                                               | Theory/Perspective                                                                                                                                                                             | Geographic Area | FF vs. non-FF                  | Focus               |
|----------------------------------------------------------------------------------------------------------------------------------------------------------------------------------------------------------------|----------------------------|----------------------------------------------------------------------------------------------------------------------------------------------------------------------------------|------------------------------------------------------------------------------------------------------------------------------------------------------------------------------------------------|-----------------|--------------------------------|---------------------|
| Anderson & Reeb (2004)<br><a href="https://doi.org/10.2307/4131472">https://doi.org/10.2307/4131472</a>                                                                                                        | Quantitative               | 403 firms from Standard & Poor's 500 belonging to different industries                                                                                                           | Agency/stewardship theories                                                                                                                                                                    | North America   | Family versus non-family firms | Conflict            |
| Aragón-Amonarriz et al. (2019)<br><a href="https://doi.org/10.1007/s10551-017-3728-7">https://doi.org/10.1007/s10551-017-3728-7</a>                                                                            | Qualitative                | 3 Mexican family SMEs belonging to different sectors                                                                                                                             | n.e. (reference to stewardship theory, socioemotional wealth and literatures on family social capital-family business responsible ownership-corporate governance)                              | North America   | Conceptual comparison          | Conflict            |
| Athanassiou et al. (2002)<br><a href="https://doi.org/10.1016/S1090-9516(02)00073-1">https://doi.org/10.1016/S1090-9516(02)00073-1</a>                                                                         | Quantitative               | 42 Mexican family firms belonging to different industries: 201 individuals answered. 2 questionnaires were used, one for the founder and one for each of the other TMT managers. | Social network theory                                                                                                                                                                          | North America   | Only family firms              | Cohesion            |
| Avloniti et al. (2014)<br><a href="https://doi.org/10.1007/s11365-013-0271-6">https://doi.org/10.1007/s11365-013-0271-6</a>                                                                                    | Conceptual                 | n.a.                                                                                                                                                                             | n.e. (integration of different literatures: family business, sociology, psychology)                                                                                                            | n.a.            | Only family firms              | Conflict            |
| Beehr et al. (1997)<br><a href="https://doi.org/10.1002/(SICI)1099-1379(199705)18:3&lt;297::AID-JOB805&gt;3.0.CO;2-D">https://doi.org/10.1002/(SICI)1099-1379(199705)18:3&lt;297::AID-JOB805&gt;3.0.CO;2-D</a> | Quantitative               | 17 family firms and 17 non-family businesses From U.S. belonging to the manufacturing industry                                                                                   | Role theory (theory on role conflict in the workplace)                                                                                                                                         | North America   | Family versus non-family firms | Conflict & Cohesion |
| Bettinelli (2011)<br><a href="https://doi.org/10.1177/0894486511402196">https://doi.org/10.1177/0894486511402196</a>                                                                                           | Quantitative               | 90 responses from directors of Italian family firms                                                                                                                              | Process-based view of boards with agency theory; stewardship theory, resource dependence theory integrated                                                                                     | Europe          | Conceptual comparison          | Cohesion            |
| Björnberg & Nicholson (2007)<br><a href="https://doi.org/10.1111/j.1741-6248.2007.00098.x">https://doi.org/10.1111/j.1741-6248.2007.00098.x</a>                                                                | Quantitative               | 291 participants from various U.K. Institutions of higher education, including staff, faculty, and students                                                                      | Family systems (rooted in family psychology)                                                                                                                                                   | Europe          | Family versus non-family firms | Cohesion            |
| Björnberg & Nicholson (2012)<br><a href="https://doi.org/10.1177/0894486511432471">https://doi.org/10.1177/0894486511432471</a>                                                                                | Qualitative + Quantitative | 8 U.K. family firms for the qualitative research + 960 participants for the quantitative research                                                                                | Attachment/ social identity theory (from social psychology)                                                                                                                                    | Europe          | Only family firms              | Cohesion            |
| Bobillo et al. (2013)<br><a href="https://doi.org/10.3846/16111699.2012.707621">https://doi.org/10.3846/16111699.2012.707621</a>                                                                               | Quantitative               | 338 Spanish family firms                                                                                                                                                         | n.e. (Use of different literatures: traditional internationalization theory along with family business literature -to propose a new perspective that accounts for family firm characteristics) | Europe          | Conceptual comparison          | Conflict            |
| Brenes et al. (2006)<br><a href="https://doi.org/10.1016/j.jbusres.2005.09.011">https://doi.org/10.1016/j.jbusres.2005.09.011</a>                                                                              | Qualitative                | 3 family firms from Latin America belonging to different industries                                                                                                              | n.e. (Use of family business literature)                                                                                                                                                       | Latin America   | Only family firms              | Conflict            |
| Cabrera-Suárez et al. (2014)<br><a href="https://doi.org/10.1016/j.jfbs.2014.05.003">https://doi.org/10.1016/j.jfbs.2014.05.003</a>                                                                            | Quantitative               | 173 family firms from Spain                                                                                                                                                      | Socioemotional wealth perspective                                                                                                                                                              | Europe          | Conceptual comparison          | Cohesion            |

|                                                                                                                                               |                        |                                                                                                                     |                                                                                 |                 |                                |                     |
|-----------------------------------------------------------------------------------------------------------------------------------------------|------------------------|---------------------------------------------------------------------------------------------------------------------|---------------------------------------------------------------------------------|-----------------|--------------------------------|---------------------|
| Carr et al. (2011)<br><a href="https://doi.org/10.1111/j.1540-6520.2011.00499.x">https://doi.org/10.1111/j.1540-6520.2011.00499.x</a>         | Quantitative           | 341 family business founders or cofounders from the U.S.                                                            | Social capital theory (sociology)                                               | North America   | Only family firms              | Cohesion            |
| Cater et al. (2016)<br><a href="https://doi.org/10.1177/0894486516656255">https://doi.org/10.1177/0894486516656255</a>                        | Qualitative            | 19 family firms from U.S. belonging to different industries                                                         | Conflict theory + different literatures: family and team dynamics in succession | North America   | Only family firms              | Conflict            |
| Chirico & Salvato (2016)<br><a href="https://doi.org/10.1111/etap.12114">https://doi.org/10.1111/etap.12114</a>                               | Quantitative           | 199 Swiss family firms belonging to different industries                                                            | Knowledge-based theoretical approach                                            | Europe          | Conceptual comparison          | Conflict            |
| Chirico et al. (2011)<br><a href="https://doi.org/10.1002/sjfb.121">https://doi.org/10.1002/sjfb.121</a>                                      | Quantitative           | 199 Swiss family firms belonging to different industries                                                            | Resource-based view (resource orchestration)                                    | Europe          | Conceptual comparison          | Conflict            |
| Chrisman et al. (2012)<br><a href="https://doi.org/10.1111/j.1540-6520.2010.00407.x">https://doi.org/10.1111/j.1540-6520.2010.00407.x</a>     | Quantitative           | 1060 family firms from the U.S. belonging to different industries                                                   | Behavioral/ stakeholder theories (organizational studies)                       | North America   | Conceptual comparison          | Cohesion            |
| Claßen & Schulte (2017)<br><a href="https://doi.org/10.1108/JOCM-04-2016-0071">https://doi.org/10.1108/JOCM-04-2016-0071</a>                  | Qualitative            | 21 family members of German family firms belonging to different industries                                          | Systems theory                                                                  | Europe          | Conceptual comparison          | Conflict            |
| Collin & Ahlberg (2012)<br><a href="https://doi.org/10.1016/j.jfbs.2012.11.001">https://doi.org/10.1016/j.jfbs.2012.11.001</a>                | Quantitative           | 68 small and medium-sized Swedish family firms                                                                      | Evolutionary psychology (theory of inclusive fitness)                           | Europe          | Only family firms              | Conflict            |
| Davis & Harveston (1999)<br><a href="https://doi.org/10.1111/j.1741-6248.1999.00311.x">https://doi.org/10.1111/j.1741-6248.1999.00311.x</a>   | Quantitative           | 1002 family firms from the U.S. belonging to different industries                                                   | n.e. (use of family business succession literature)                             | North America   | Only family firms              | Conflict            |
| Davis & Harveston (2001)<br><a href="https://doi.org/10.1111/0447-2778.00003">https://doi.org/10.1111/0447-2778.00003</a>                     | Quantitative           | 1002 family firms from the U.S. belonging to different industries                                                   | Conflict theory                                                                 | North America   | Only family firms              | Conflict            |
| De Clercq & Belausteguigoitia (2015)<br><a href="https://doi.org/10.1016/j.jfbs.2015.04.003">https://doi.org/10.1016/j.jfbs.2015.04.003</a>   | Conceptual             | n.a.                                                                                                                | n.e. (use of conflict management and social capital literature)                 | n.a.            | Only family firms              | Conflict & Cohesion |
| de Vries (1993)<br><a href="https://doi.org/10.1016/0090-2616(93)90071-8">https://doi.org/10.1016/0090-2616(93)90071-8</a>                    | Conceptual             | n.a.                                                                                                                | n.e. (use of psychology literature)                                             | n.a.            | Only family firms              | Conflict            |
| Discua Cruz et al. (2013)<br><a href="https://doi.org/10.1111/j.1540-6520.2012.00534.x">https://doi.org/10.1111/j.1540-6520.2012.00534.x</a>  | Qualitative            | 7 case studies of FETs from Honduras belonging to different sectors                                                 | Stewardship/social capital theories                                             | Central America | Conceptual comparison          | Conflict            |
| Duréndez et al. (2019)<br><a href="https://doi.org/10.1111/auar.12217">https://doi.org/10.1111/auar.12217</a>                                 | Quantitative           | 281 Spanish family firms belonging to different industries                                                          | Agency theory                                                                   | Europe          | Conceptual comparison          | Conflict            |
| Eddleston & Kellermanns (2007)<br><a href="https://doi.org/10.1016/j.jbusvent.2006.06.004">https://doi.org/10.1016/j.jbusvent.2006.06.004</a> | Quantitative           | 107 questionnaires returned from 60 U.S. family firms                                                               | Stewardship theory                                                              | North America   | Only family firms              | Conflict            |
| Eddleston & Morgan (2014)<br><a href="https://doi.org/10.1016/j.jfbs.2014.08.003">https://doi.org/10.1016/j.jfbs.2014.08.003</a>              | Conceptual (Editorial) | n.a.                                                                                                                | n.e.                                                                            | n.a.            | Family versus non-family firms | Cohesion            |
| Eddleston et al. (2008)<br><a href="https://doi.org/10.1111/j.1540-627X.2008.00252.x">https://doi.org/10.1111/j.1540-627X.2008.00252.x</a>    | Quantitative           | 37 privately held family firms from the U.S.                                                                        | Multilevel theory and research design                                           | North America   | Only family firms              | Conflict            |
| Ensley (2006)<br><a href="https://doi.org/10.1111/j.1540-6520.2006.00148.x">https://doi.org/10.1111/j.1540-6520.2006.00148.x</a>              | Quantitative           | 351 managers from 168 family firms listed in the Inc. 500 belonging to different industries                         | n.e. (reference to literature on intragroup conflict)                           | North America   | Only family firms              | Conflict            |
| Ensley & Pearson (2005)<br><a href="https://doi.org/10.1111/j.1540-6520.2005.00082.x">https://doi.org/10.1111/j.1540-6520.2005.00082.x</a>    | Quantitative           | 196 managers from 88 firms listed in the 1994 Inc. 500; 192 managers from 70 firms listed in the 1996 Inc. 500; 168 | Upper echelon/ theories on behavioral dynamics of teams                         | North America   | Family versus non-family firms | Conflict & Cohesion |

|                                                                                                                                                   |                   |                                                                                          |                                                                               |               |                                |                     |
|---------------------------------------------------------------------------------------------------------------------------------------------------|-------------------|------------------------------------------------------------------------------------------|-------------------------------------------------------------------------------|---------------|--------------------------------|---------------------|
|                                                                                                                                                   |                   | managers from 66 firms listed in the 199 Inc. 500                                        |                                                                               |               |                                |                     |
| Ensley et al. (2007)<br><a href="https://doi.org/10.1016/j.jbusres.2006.12.012">https://doi.org/10.1016/j.jbusres.2006.12.012</a>                 | Quantitative      | 88 non-family and 112 privately held family firms listed in the Inc. 500                 | Upper echelons/ tournament theories                                           | North America | Family versus non-family firms | Conflict & Cohesion |
| Fernández-Roca et al. (2014)<br><a href="https://doi.org/10.1017/S1467222700016116">https://doi.org/10.1017/S1467222700016116</a>                 | Qualitative       | Single case of a Spanish family firm                                                     | n.e. (use of business history and family business literature)                 | Europe        | Only family firms              | Conflict & Cohesion |
| Filser et al. (2018)<br><a href="https://doi.org/10.1111/j.pim.12433">https://doi.org/10.1111/j.pim.12433</a>                                     | Quantitative      | 166 family SMEs in the first wave; 103 family SMEs in the second wave from Finland       | Socioemotional wealth perspective/ family functionality view (from sociology) | Europe        | Only family firms              | Cohesion            |
| Filser, et al. (2013)<br><a href="https://doi.org/10.1108/01409171311306409">https://doi.org/10.1108/01409171311306409</a>                        | Literature Review | n.a.                                                                                     | n.a.                                                                          | n.a.          | Only family firms              | Conflict            |
| Gagné et al. (2014)<br><a href="https://doi.org/10.1080/1359432X.2014.906403">https://doi.org/10.1080/1359432X.2014.906403</a>                    | Literature Review | n.a.                                                                                     | General theory of relationships (organizational behavior)                     | n.a.          | Conceptual comparison          | Conflict            |
| Goergen et al. (2015)<br><a href="https://doi.org/10.1016/j.jcorpfin.2015.08.011">https://doi.org/10.1016/j.jcorpfin.2015.08.011</a>              | Quantitative      | 150 firms from the German stock exchange                                                 | n.e (reference to corporate governance literature)                            | Europe        | Family versus non-family firms | Conflict            |
| Haberman & Danes (2007)<br><a href="https://doi.org/10.1111/j.1741-6248.2007.00088.x">https://doi.org/10.1111/j.1741-6248.2007.00088.x</a>        | Qualitative       | 22 family businesses                                                                     | The family FIRO (fundamental interpersonal relationship orientation) model    | n.e.          | Only family firms              | Conflict & Cohesion |
| Herrero (2018)<br><a href="https://doi.org/10.1177/0894486518784475">https://doi.org/10.1177/0894486518784475</a>                                 | Quantitative      | 400 firms: 230 family firms and 170 nonfamily firms from Spain's manufacturing sector    | Family social capital theory (family business theory rooted in sociology)     | Europe        | Family versus non-family firms | Conflict & Cohesion |
| Herrero & Hughes (2019)<br><a href="https://doi.org/10.1016/j.jfbs.2019.01.001">https://doi.org/10.1016/j.jfbs.2019.01.001</a>                    | Quantitative      | 163 privately held family firms belonging to the food manufacturing sector in Spain      | Family social capital theory (family business theory rooted in sociology)     | Europe        | Conceptual comparison          | Cohesion            |
| Jaskiewicz et al. (2016)<br><a href="https://doi.org/10.1111/eap.12146">https://doi.org/10.1111/eap.12146</a>                                     | Qualitative       | 21 family firms from Germany belonging to the wine industry                              | Institutional theory                                                          | Europe        | Conceptual comparison          | Conflict & Cohesion |
| Jayantilal et al. (2016)<br><a href="https://doi.org/10.1016/j.jfbs.2016.10.001">https://doi.org/10.1016/j.jfbs.2016.10.001</a>                   | Conceptual        | n.a.                                                                                     | Game theory                                                                   | n.a.          | Only family firms              | Conflict            |
| Jiménez et al. (2015)<br><a href="https://doi.org/10.1007/s10551-013-1941-6">https://doi.org/10.1007/s10551-013-1941-6</a>                        | Quantitative      | 126 businesses from Spain belonging to the car dealerships sectors                       | Institutional theory and family social capital theory                         | Europe        | Family versus non-family firms | Cohesion            |
| Kaczmarek et al. (2012)<br><a href="https://doi.org/10.1111/j.1467-8683.2011.00895.x">https://doi.org/10.1111/j.1467-8683.2011.00895.x</a>        | Quantitative      | UK firms that constituted the Financial Times and London Stock Exchange (FTSE) 350 Index | Social identity theory (main theory)                                          | Europe        | Family versus non-family firms | Cohesion            |
| Kammerlander et al. (2015)<br><a href="https://doi.org/10.1177/0894486515607777">https://doi.org/10.1177/0894486515607777</a>                     | Qualitative       | 41 family firms from Italy belonging to the wine industry                                | Organizational (and innovation) theory                                        | Europe        | Only family firms              | Conflict            |
| Kellermanns & Eddleston (2004)<br><a href="https://doi.org/10.1111/j.1540-6520.2004.00040.x">https://doi.org/10.1111/j.1540-6520.2004.00040.x</a> | Conceptual        | n.a.                                                                                     | Conflict theory                                                               | n.a.          | Conceptual comparison          | Conflict            |
| Kellermanns & Eddleston (2007)<br><a href="https://doi.org/10.1016/j.jbusres.2006.12.018">https://doi.org/10.1016/j.jbusres.2006.12.018</a>       | Quantitative      | 36 family firms from the U.S.                                                            | Conflict/social exchange theories                                             | North America | Only family firms              | Conflict            |

|                                                                                                                                             |              |                                                                                                             |                                                                                                                            |                     |                                |                     |
|---------------------------------------------------------------------------------------------------------------------------------------------|--------------|-------------------------------------------------------------------------------------------------------------|----------------------------------------------------------------------------------------------------------------------------|---------------------|--------------------------------|---------------------|
| Kidwell et al. (2012)<br><a href="https://doi.org/10.1007/s10551-011-1014-7">https://doi.org/10.1007/s10551-011-1014-7</a>                  | Quantitative | 147 surveys obtained from various U.S. family firms                                                         | Leader member exchange and group value model of justice (use of ethical climate and family business literature)            | North America       | Conceptual comparison          | Conflict & Cohesion |
| Kiong (2005)<br><a href="https://doi.org/10.1177/0268580905049909">https://doi.org/10.1177/0268580905049909</a>                             | Qualitative  | 96 managers, directors and owners of 43 Chinese family firms. The discussion of findings focuses on 3 cases | n.e. (reference to literature on sociology and family firms)                                                               | Asia                | Only family firms              | Conflict            |
| Konopaski et al. (2015)<br><a href="https://doi.org/10.5465/aml.2014.0244">https://doi.org/10.5465/aml.2014.0244</a>                        | Qualitative  | 18 small and medium-sized family businesses from Canada belonging to different industries                   | Situated learning perspective                                                                                              | North America       | Only family firms              | Cohesion            |
| Kudlats et al. (2019)<br><a href="https://doi.org/10.1016/j.jbusres.2018.12.073">https://doi.org/10.1016/j.jbusres.2018.12.073</a>          | Qualitative  | 19 firm members from 5 U.S. multi-family firms belonging to different industries                            | Intergroup theory                                                                                                          | North America       | Conceptual comparison          | Conflict & Cohesion |
| Lambrecht & Lievens (2008)<br><a href="https://doi.org/10.1177/08944865080210040103">https://doi.org/10.1177/08944865080210040103</a>       | Qualitative  | 20 individuals from 17 family businesses belonging to different industries                                  | Procedural Justice Theory (social scientists-psychology)                                                                   | n.e.                | Only family firms              | Conflict & Cohesion |
| Le Breton-Miller & Miller (2014)<br><a href="https://doi.org/10.1080/1359432X.2014.907276">https://doi.org/10.1080/1359432X.2014.907276</a> | Commentary   | n.a.                                                                                                        | Identity/social identity theories (rooted in social-psychology and organizational behavior)                                | n.a.                | Only family firms              | Conflict            |
| Lee (2006)<br><a href="https://doi.org/10.1111/j.1741-6248.2006.00069.x">https://doi.org/10.1111/j.1741-6248.2006.00069.x</a>               | Quantitative | 88 members of family-owned businesses from China                                                            | n.e. (use of family business and family studies literature)                                                                | Asia                | Conceptual comparison          | Cohesion            |
| Levinson (1971)                                                                                                                             | Conceptual   | n.a.                                                                                                        | n.e.                                                                                                                       | n.a.                | Only family firms              | Conflict            |
| Long & Mathews (2011)<br><a href="https://doi.org/10.5840/becq201121217">https://doi.org/10.5840/becq201121217</a>                          | Conceptual   | n.a.                                                                                                        | Social exchange perspective                                                                                                | n.a.                | Family versus non-family firms | Cohesion            |
| Marshall et al. (2006)<br><a href="https://doi.org/10.1016/j.jbusvent.2005.06.004">https://doi.org/10.1016/j.jbusvent.2005.06.004</a>       | Quantitative | 205 family firms from the U.S. belonging to different industries                                            | Leadership theory (rooted in organizational behavior)/conflict management literature                                       | North America       | Only family firms              | Conflict            |
| Michael-Tsabari & Tan (2013)<br><a href="https://doi.org/10.1515/rj-2012-0018">https://doi.org/10.1515/rj-2012-0018</a>                     | Qualitative  | 3 case studies of sports teams from North America and Israel                                                | n.e. (use of family therapy, organizational behavior and family business literature and reference to institutional theory) | North America; Asia | Family versus non-family firms | Cohesion            |
| Michael-Tsabari & Weiss (2015)<br><a href="https://doi.org/10.1177/0894486513497506">https://doi.org/10.1177/0894486513497506</a>           | Conceptual   | n.a.                                                                                                        | Game theory                                                                                                                | n.a.                | Only family firms              | Conflict & Cohesion |
| Miller et al. (2009)<br><a href="https://doi.org/10.1057/jibs.2009.11">https://doi.org/10.1057/jibs.2009.11</a>                             | Quantitative | 170 Korean high-technology firms                                                                            | n.e. (use of family business and international business literature)                                                        | Asia                | Family versus non-family firms | Cohesion            |
| Morgan & Gómez-Mejía (2014)<br><a href="https://doi.org/10.1016/j.jfbs.2014.07.001">https://doi.org/10.1016/j.jfbs.2014.07.001</a>          | Conceptual   | n.a.                                                                                                        | Socioemotional wealth perspective/Social Exchange Theory                                                                   | n.a.                | Conceptual comparison          | Conflict            |
| Morris et al. (1997)<br><a href="https://doi.org/10.1016/S0883-9026(97)00010-4">https://doi.org/10.1016/S0883-9026(97)00010-4</a>           | Quantitative | 177 respondents from the U.S. firms belonging to different industries                                       | n.e. (use of family business succession literature)                                                                        | North America       | Conceptual comparison          | Conflict            |

|                                                                                                                                           |                   |                                                                                                                           |                                                                                                                            |               |                                |                     |
|-------------------------------------------------------------------------------------------------------------------------------------------|-------------------|---------------------------------------------------------------------------------------------------------------------------|----------------------------------------------------------------------------------------------------------------------------|---------------|--------------------------------|---------------------|
| Nazer & Llorca-Jaña (2020)<br><a href="https://doi.org/10.1080/0076791.2020.1717471">https://doi.org/10.1080/0076791.2020.1717471</a>     | Qualitative       | 3 family firms from Chile                                                                                                 | n.e. (use of family business succession literature)                                                                        | Latin America | Only family firms              | Conflict & Cohesion |
| Nicholson (2008)<br><a href="https://doi.org/10.1111/j.1741-6248.2007.00111.x">https://doi.org/10.1111/j.1741-6248.2007.00111.x</a>       | Literature Review | n.a.                                                                                                                      | Evolutionary psychology                                                                                                    | n.a.          | Family versus non-family firms | Conflict            |
| Pardo-del-Val (2009)<br><a href="https://doi.org/10.1007/s11365-008-0092-1">https://doi.org/10.1007/s11365-008-0092-1</a>                 | Qualitative       | 1 case study of a Spanish family firm                                                                                     | Change management theory (mainly from an organizational behavior perspective)                                              | Europe        | Only family firms              | Conflict            |
| Pearson et al. (2014)<br><a href="https://doi.org/10.1080/1359432X.2014.911174">https://doi.org/10.1080/1359432X.2014.911174</a>          | Commentary        | n.a.                                                                                                                      | Team and team processes theories                                                                                           | n.a.          | Conceptual comparison          | Conflict & Cohesion |
| Petriglieri & Stein (2012)<br><a href="https://doi.org/10.1177/0170840612448158">https://doi.org/10.1177/0170840612448158</a>             | Qualitative       | 1 case study of an Italian family firm belonging to the fashion industry                                                  | Systems psychodynamic perspective                                                                                          | Europe        | Conceptual comparison          | Conflict            |
| Qin & Deng (2016)<br><a href="https://doi.org/10.1007/s11846-014-0138-4">https://doi.org/10.1007/s11846-014-0138-4</a>                    | Quantitative      | 296 private firms from China belonging to different industries                                                            | Social capital theory (sociology)                                                                                          | Asia          | Family versus non-family firms | Cohesion            |
| Rousseau et al. (2018)<br><a href="https://doi.org/10.1177/0894486518790425">https://doi.org/10.1177/0894486518790425</a>                 | Quantitative      | 149 CEO owners from Germany belonging to different industries                                                             | Socioemotional wealth perspective, behavioral agency model, mixed gambles, which are all three grounded in prospect theory | Europe        | Only family firms              | Conflict            |
| Salvato & Melin (2008)<br><a href="https://doi.org/10.1177/08944865080210030107">https://doi.org/10.1177/08944865080210030107</a>         | Qualitative       | Comparative study of 4 cases of multigenerational family firms (2 Italian, 2 from Swiss) from wine and spirits industries | Social capital theory (sociology)                                                                                          | Europe        | Conceptual comparison          | Cohesion            |
| Samara et al. (2019)<br><a href="https://doi.org/10.1016/j.bushor.2018.09.001">https://doi.org/10.1016/j.bushor.2018.09.001</a>           | Conceptual        | n.a.                                                                                                                      | n.e. (use of family business and corporate governance literature)                                                          | n.a.          | Only family firms              | Conflict & Cohesion |
| Sanchez-Ruiz et al. (2019)<br><a href="https://doi.org/10.1177/0894486519836833">https://doi.org/10.1177/0894486519836833</a>             | Quantitative      | 845 family firms in the 2002 AFBS and 646 family firms in the 2007 AFBS (U.S.)                                            | Family social capital theory                                                                                               | North America | Conceptual comparison          | Cohesion            |
| Schjoedt et al. (2013)<br><a href="https://doi.org/10.1111/j.1540-6520.2012.00549.x">https://doi.org/10.1111/j.1540-6520.2012.00549.x</a> | Conceptual        | n.a.                                                                                                                      | Behavioral theory of management teams                                                                                      | n.a.          | Family versus non-family firms | Conflict            |
| Schmidts (2013)<br><a href="https://doi.org/10.5172/ser.2013.20.2.76">https://doi.org/10.5172/ser.2013.20.2.76</a>                        | Qualitative       | 1 family firm from New Zealand                                                                                            | Social identity theory (social psychology)                                                                                 | Oceania       | Only family firms              | Conflict            |
| Scholes et al. (2016)<br><a href="https://doi.org/10.1002/tie.21729">https://doi.org/10.1002/tie.21729</a>                                | Qualitative       | 6 internationally active, small family owned firms from Singapore belonging to different industries                       | Socioemotional wealth perspective                                                                                          | Asia          | Conceptual comparison          | Conflict & Cohesion |
| Sciascia et al. (2013)<br><a href="https://doi.org/10.1111/j.1540-6520.2012.00528.x">https://doi.org/10.1111/j.1540-6520.2012.00528.x</a> | Quantitative      | 199 Swiss family firms belonging to different industries                                                                  | Upper echelons theory                                                                                                      | Europe        | Only family firms              | Conflict & Cohesion |
| Sharma & Sharma (2011)<br><a href="https://doi.org/10.5840/beg.201121218">https://doi.org/10.5840/beg.201121218</a>                       | Conceptual        | n.a.                                                                                                                      | Theory of planned behavior                                                                                                 | n.a.          | Family versus non-family firms | Conflict & Cohesion |
| Sonfield & Lussier (2009)<br><a href="https://doi.org/10.1007/s11365-009-0109-4">https://doi.org/10.1007/s11365-009-0109-4</a>            | Quantitative      | 593 family firms from 6 different countries                                                                               | n.e. (relies on family business and conflict literature)                                                                   | n.a.          | Only family firms              | Conflict            |
| Spriggs et al. (2013)<br><a href="https://doi.org/10.1177/0894486512468600">https://doi.org/10.1177/0894486512468600</a>                  | Quantitative      | 199 individuals who must be family member AND manager in U.S. business                                                    | Resource based view perspective/agency theory                                                                              | North America | Conceptual comparison          | Conflict & Cohesion |



|                                                                                                                                                 |              |                                                                                           |                                                                                 |               |                                |                     |
|-------------------------------------------------------------------------------------------------------------------------------------------------|--------------|-------------------------------------------------------------------------------------------|---------------------------------------------------------------------------------|---------------|--------------------------------|---------------------|
|                                                                                                                                                 |              | belonging to different industries                                                         |                                                                                 |               |                                |                     |
| Sreih et al. (2019)<br><a href="https://doi.org/10.1108/JOCM-01-2018-0030">https://doi.org/10.1108/JOCM-01-2018-0030</a>                        | Quantitative | 98 Lebanese family firms belonging to different industries                                | n.e. (relies on family business and conflict literature)                        | Asia          | Only family firms              | Conflict            |
| Vallejo (2009)<br><a href="https://doi.org/10.1177/0894486508327892">https://doi.org/10.1177/0894486508327892</a>                               | Quantitative | 121 Spanish firms belonging to the automobile sector                                      | Institutional/transformational leadership theory                                | Europe        | Family versus non-family firms | Cohesion            |
| Vallejo-Martos (2011)<br><a href="https://doi.org/10.3846/16111699.2011.599407">https://doi.org/10.3846/16111699.2011.599407</a>                | Quantitative | 295 questionnaires for 90 Spanish family firms belonging to the automobile sector         | Neo-institutional/transformational leadership theories                          | Europe        | Conceptual comparison          | Cohesion            |
| Van der Heyden et al. (2005)<br><a href="https://doi.org/10.1111/j.1741-6248.2005.00027.x">https://doi.org/10.1111/j.1741-6248.2005.00027.x</a> | Qualitative  | 5 cases of family businesses belonging to different industries                            | Procedural justice theory (social scientists-psychology)                        | n.a.          | Only family firms              | Conflict            |
| Van der Merwe et al. (2012)<br><a href="https://doi.org/10.4102/sajbm.v43i4.479">https://doi.org/10.4102/sajbm.v43i4.479</a>                    | Quantitative | 173 family firms from South Africa                                                        | n.e. (use of family business literature)                                        | Africa        | Conceptual comparison          | Conflict & Cohesion |
| Venter et al. (2003)<br><a href="https://doi.org/10.4102/sajbm.v34i4.687">https://doi.org/10.4102/sajbm.v34i4.687</a>                           | Quantitative | 332 respondents from small and medium-sized South African family businesses               | n.e. (use of family business literature)                                        | Africa        | Only family firms              | Cohesion            |
| Vollero et al. (2019)<br><a href="https://doi.org/10.1002/res.2548">https://doi.org/10.1002/res.2548</a>                                        | Qualitative  | 8 family firms from Italy, Belgium, Germany and France belonging to different industries  | Systems theory                                                                  | Europe        | Conceptual comparison          | Cohesion            |
| Waldkirch et al. (2018)<br><a href="https://doi.org/10.1016/j.hrmr.2017.05.006">https://doi.org/10.1016/j.hrmr.2017.05.006</a>                  | Conceptual   | n.a.                                                                                      | Social exchange perspective                                                     | n.a.          | Only family firms              | Cohesion            |
| Zahra (2012)<br><a href="https://doi.org/10.1007/s11187-010-9266-7">https://doi.org/10.1007/s11187-010-9266-7</a>                               | Quantitative | 741 U.S. manufacturing family firms                                                       | Organizational learning/behavioral theories                                     | North America | Only family firms              | Cohesion            |
| Zattoni et al. (2015)<br><a href="https://doi.org/10.1177/0149206312463936">https://doi.org/10.1177/0149206312463936</a>                        | Quantitative | 421 non-public medium-sized and small firms from Norway belonging to different industries | Process-based view of boards of directors + agency/resource dependence theories | Europe        | Family versus non-family firms | Conflict            |
| Zona (2014)<br><a href="https://doi.org/10.1007/s11187-014-9587-z">https://doi.org/10.1007/s11187-014-9587-z</a>                                | Quantitative | 74 non listed Italian family firms belonging to the manufacturing sector                  | Process-based view of boards                                                    | Europe        | Only family firms              | Conflict            |
| Zona (2016)<br><a href="https://doi.org/10.1007/s11187-016-9764-3">https://doi.org/10.1007/s11187-016-9764-3</a>                                | Quantitative | 104 Italian large manufacturing family firms                                              | Process-based view of boards of directors integrated with upper echelons theory | Europe        | Conceptual comparison          | Conflict            |

Notes; n.a. = not applicable; n.e. = not explicit
